# Supplementary material for: Comparison of plant microbiota in diseased and healthy rice reveals methylobacteria as health signatures with biocontrol capabilities
Source: Front Plant Sci. 2024 Oct 29;15:1468192. doi: 10.3389/fpls.2024.1468192 (PMC11554501; doi:10.3389/fpls.2024.1468192)
Supplement: Supplementary file 11 [file Table5.xlsx]

## Sheet: Feuil1
% differences	ABIP3533	ABIP3560	ABIP3561	ABIP3562	Mradiotolerans_DSM_1819_AB175640_..	Mtardum_RB_677_AB252208_..	MterraeT_17Sr128_DK419_..	Moryzae_CBMB20_AY683045_..	Moryzihabitans_TER1_MF980971_..	Mphyllosphaerae_CBMB27_EF126746_..	ASV14504	ASV14509	ASV15875	ASV14552	Mindicum_SE2.11_KP272100_..	Maerolatum_5413S11_EF174498_..	Mterricola_17Sr1_39_KY939568_..	Methylorubrum_salsuginis_MR_EF015478_..	Methylorubrum_rhodinum_DSM_2163_AB175644_..	Mkomagatae_002079_AB252201_..	Mthuringiense_CCM_7787_MT760178_..	SinorhizobiummelilotiIAM12611T-D14509_..
ABIP3533
ABIP3560	90
ABIP3561	90	100
ABIP3562	87.75	85.5	85.5
M. radiotolerans_DSM_1819_AB175640_..	87.75	85.5	85.5	100
M. tardum_RB_677_AB252208_..	87.5	84.5	84.75	99	98.75
M. terraeT_17Sr128_DK419_..	97.75	87.5	87.5	82	67.5	66.25
M.oryzae_CBMB20_AY683045_..	86.75	84	84.25	98	96.5	96.75	70
M.oryzihabitans_TER1_MF980971_..	91	90.75	90.75	85.5	81.75	80.75	72.5	78.5
M. phyllosphaerae_CBMB27_EF126746_..	86.25	83	83.75	96	95.25	95.5	75.75	96.5	78.75
ASV_14504	91.75	94.25	94.25	99	99	99	91.75	99	93	98.75
ASV_14509	92.75	95	95	97	97	97	92.75	97	94	96.75	97.25
ASV_15875	99.75	96	96	92.25	92.25	92.25	99.75	92.25	96.25	92	91.5	92.5
ASV_14552	96.25	100	100	94.5	94.5	94.5	96.25	94.5	98.25	94.25	94.25	95	96
M. indicum_SE2.11_KP272100_..	97.5	86.75	87	80.5	78.25	77.75	90.75	77.5	82	76.5	91.5	92.5	100	96
M. aerolatum_5413S11_EF174498_..	84.25	87.5	87.5	93.5	89.75	89.75	74.75	89	78.5	87.5	100	97.25	91.5	94.25	77.25
M. terricola_17Sr1_39_KY939568_..	97.25	81.5	81.75	77.25	74.5	73.75	78.25	71.5	78.25	72.25	91.5	92.5	99.5	96	85.75	71.5
Methylorubrum salsuginis_MR_EF015478_..	90	100	100	85.5	83.5	82.75	68	81	86.75	81.25	94.5	95.25	96	100	83.75	85.25	78
Methylorubrum rhodinum_DSM_2163_AB175644_..	90.75	93	93	85.75	85.25	85	72.25	84.25	85.75	83.5	94.25	95	96	100	83.5	82	78.25	91.5
M. komagatae_002079_AB252201_..	87.25	85	85.25	92.25	88	88	65.25	86.75	77	85	97.25	100	92.5	95	77.75	91	71	81.5	83.5
M. thuringiense_CCM_7787_MT760178_..	86.5	86.5	86.5	88.5	85	85	78.75	85.25	79.25	85.25	96.75	95.75	92	94.75	78	86.25	73.25	85	85.25	86
Sinorhizobium meliloti IAM12611T-D14509_..	70.75	67.25	67.25	63.75	54.5	54	37.75	52.5	58	54	86.75	87.75	86.25	88.5	52.75	54.75	49	58.75	59	55.25	59.5
